# Supplementary figures and images for: Genetic Evolution and Variation of Human Adenovirus Serotype 31 Epidemic Strains in Beijing, China, during 2010–2022
Source: MDPI journal article supplement (doi:10.3390/v15061240), 2023-05-25

# Hexon

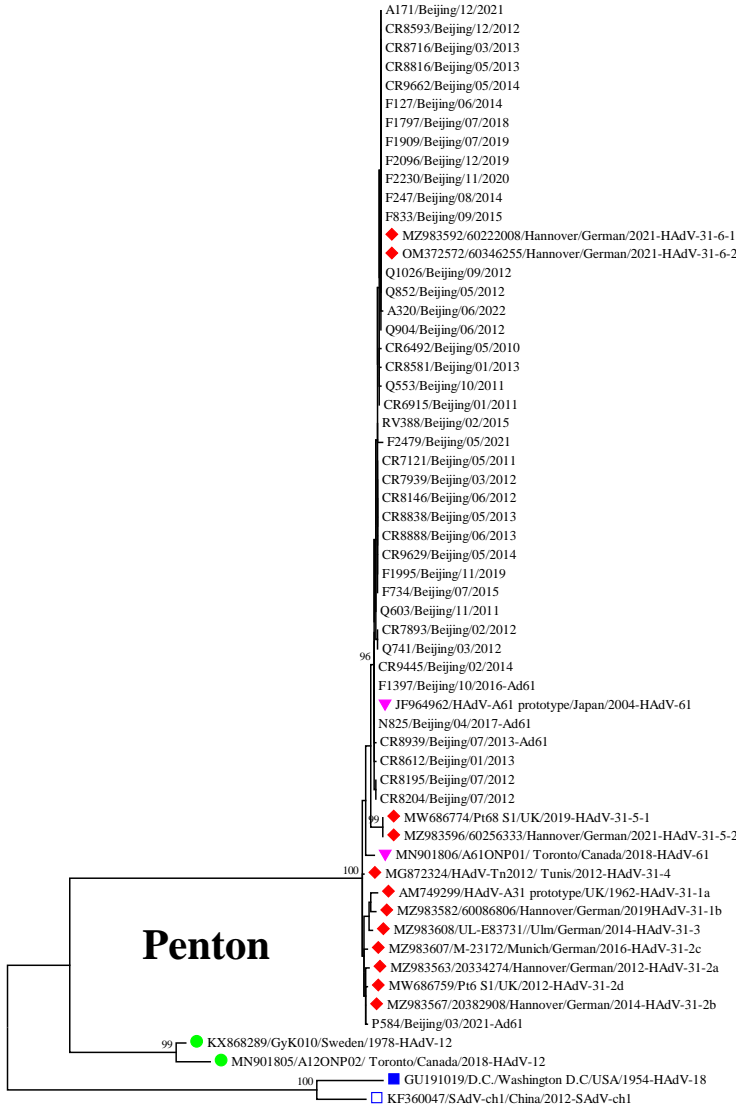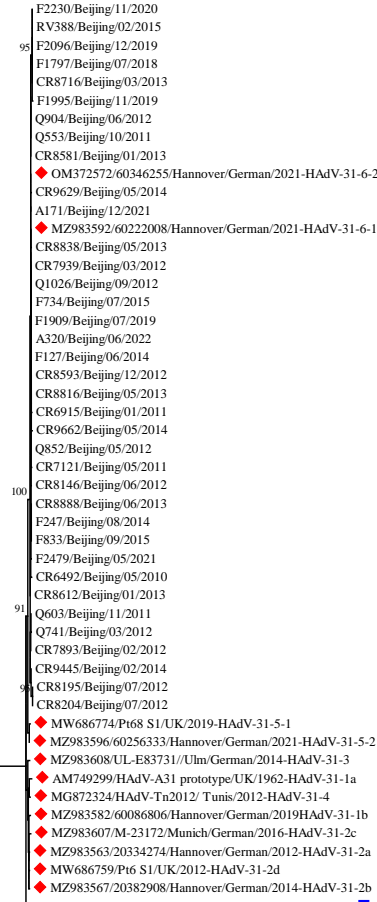

# Fiber

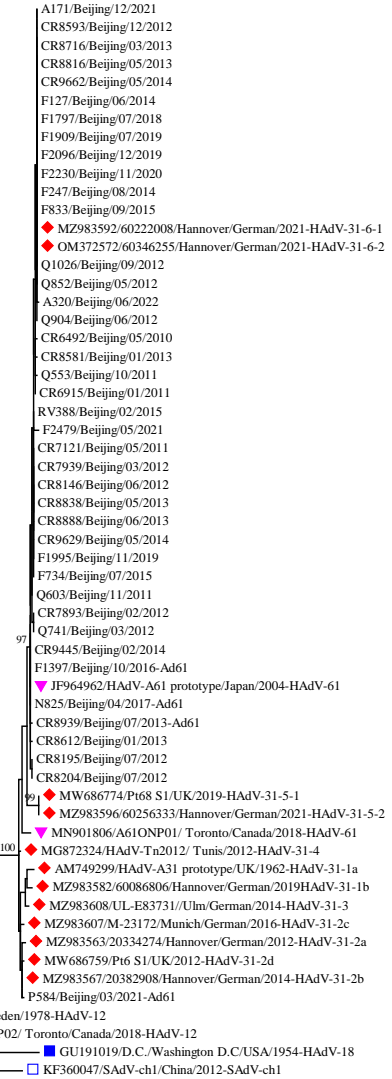

Supplement: s1 [file s1]
